# Supplementary material for: Rapid isolation of antigen-specific B-cells using droplet microfluidics
Source: RSC Adv. 2020 Jul 20;10(45):27006–13. doi: 10.1039/d0ra04328a (PMC9055518; doi:10.1039/d0ra04328a)
Supplement: RA-010-D0RA04328A-s002 [file RA-010-D0RA04328A-s002.xlsx]

## Sheet: Sheet1
Supplementary Information Dataset 1: IgG heavy- and light-chain variable DNA sequences obtained by RT-PCR performed on individual sorted droplets. RT-PCR sometimes generated more than one distinct heavy- or light-chain amplification product in a single well. Sequences in bold type were used to make scFv constructs for antibody-binding analysis experiments. In some wells, we recovered more than on…
Sorted Droplet Dispense Well Number	IgG Chain Type	Sequence
#1	Light	gacattgtgctgacccagtctcctgctttggctgtgtctctagggcagagggccaccatctcttgcaagaccaaccagaatgtcgattattatggcaatagttatatacactggtaccaacagaaaccagggcaacaacccaaactcctcatctttttagtatccaacttagcatctgggatccctgccaggttcagtggtagagggtctgggacagacttcaccctcaccattgatcctgtggaggctgatgatgctgcaacctattactgtcagcagagtaggaatcttccgtacacgtttggagctgggaccaagctggaactgaaac
	Heavy	gaggtagagctggtggagtctgggggcggcttagtgcagcctggaaggtccatgaaactctcctgtgcagcctcaggattcactttcagtaattttggcatggcctgggtccgccaggctccaacgaagggtctggagtgggtcgcatccattagtactagtggtggtaacacttactatcgagactccgtgaagggccgattcactatctccagagataatgcaaaaagcaccctatacctgcaaatggacagtctgaggtctgaggacacggccacttattactgtacaactctagatataacagtggtcgcctactttgattactggggccaaggagtcatggtcacagtctcctcag
#2	Heavy	caggtacagctgcagcagtctgggggaggcttagtgcagcctggaaggtccctgaaactctcctgtgcagcctcaggattcactttcagtgactattacatggcctgggtccgccaggctccaaagaagggtctggagtgggtcgcatccattagttatgagggtagtagcacttactatggagactccgtgaagggccgattcactatctccagagataatgcaaaaagcaccctatacctgcaaatgaacagtctgaggtctgaggacacggccacttattattgtgcaagacatcttgcgtatactacggattccccgcttatggatgcctggggtcaaggagcttcagtcactgtctcgagtg
	Light	gacattgtcttgacccagtctccttcactcctgtctgcatctgtgggagacagagtcactctcaactgcaaagcaagtcagaatatttataagaacttagcctggtatcagcaaaagcttggagaagctcccaaactcctgatttataatgcaaacagtttgcaaacgggcatcccatcaaggttcagtggcagtggatctggtacagatttcacactcaccatcagcagcctgcagcctgaagatgttgccacatatttctgccagcagtattatagcgggtacacgtttggagctgggaccaagctggaattgaaac
#3	Heavy	caggtgcagctgatggagtctgggggaggcttagtgcagcctggaaggtccatgaaactctcctgtgcagcctcaggattcactttcactaactattacatggcctgggtccgccaggctccaacgaagggtctggagtgggtcgcatccattagtactggtggtgatgtcacttactctcgagactccgtgaggggccgattcactatctccagagataatgcaaaaagcaccctatatatgcaaatggacagtctgaggtctgaggacacggccacttattactgtgcaagacggcgctacggtacctcggactactttgattactggggccaaggagtcatggtcacagtctcgagtg
	Light	gacatccagatgacccagtctcctgcctccctgtctgcttctctggaagaaattgtcaccatcacctgcaaggcaagccaggatattgatgattacttatcatggtatcagcagaaaccagggaaatctcctcagctcctgatctatgatgcaaccagtttggcagatggggtcccatcacggttcagcggcagtagatctgacacacagtattctcttaagatcagcagaccacaggttgatgattctggaatctattactgtctacagagtcacagtattccgtggacgttcggtggcggcaccaagctggaaataaaac
#4	Heavy	gaggtgcacctggtggagtctgggggaggctcagtgcagcctggaaggtccatgaaactctcctgtgcagcctcaggattcactttcagtaactattacatggcctgggtccgccaggctccaacgacgggtctggagtgggtcgcatccatcagtactggtggtggtaacacttattatcgagactccgtgaagggccgattcactatttccagagataatgcacaaaacaccctttacctgcagatggacagtctgaggtctgaggacacggccacttattactgtgcagggggggacccgggtataacccctgattactggggccaaggagtcacggtcacagtctcgagtg
	Light	atgttgtgcttgacccagacacctccctccctgtctgcatctctgggagacaaggtcaccatcacttgccaggcaagtcaaaacattaagaagtatatagcttggtatcaacaaaagcctggaaaagctcctaggctgctcatacgttacacatctacactagagtcagtcaccccatcgaggttcagtggcagtggatctgggagagattattcattcagcatcagcaacgtggagtctgaagatattgcagattattactgtctacagtacgttgaccttccatttacgttcggctcagggacgaagttggaaataaaac
	Light	gacatccagatgacccagactccaacaaccatggctgcatctccaggagagaaggtcaccatcacctgccgtgccagctcaagtgtaagctacatgcactggttccagcagaagtcaggcacctcccccaaaccctggatttatgacacatccaagctggcttctggagtcccagatcgcttcagtggcagtgggtctgggacctcttattctctcacaatcagctccatggaggctgaagatgctgctacttattactgtctgcagaggagtagttacccgtacacgtttggagctgggaccaagctggaaataaaac
#5	Heavy	caggttcatctgcaacagtctggggctgcactggtgaagcctggggcctctgtgaagttgtcttgcaaagcttctggttatacattcactgactactatatacactgggtgaagcagagtcatggaaagagccttgagtggattgggtatattaatcctaacagtggttatactaactacaatgaaaagttcaagagcaaggccacattgactgtagacaaatccaccaatacagcctatatggagcttagcagattgacatctgaggactctgcaacctattactgtacaagagaggggtctgactacagtggtccgtttgcttactggggccaaggcactctggtcactgtctcgagtg
	Light	gacatccagatgacacagtctcccacatctatgttcacatcagtaggagacagggttaccatgagctgcaaggccagtcagaatgtaggtattaatgtaggctggtaccaacagaaaacagggcagtctcctaaacggcttatctactgggcatccaaccgggacactggggtccctgatcgcttcacaggcagtggatctgggacagatttcactctcaccatcagcaacatgcaggctgaagacccagctatttattactgtctgcagcataactcctatccgctcacgttcggttctgggaccaagctggaaataaaac
#6	Heavy	gaggtgaagctggtggagtctggccctgggatattgcagccctcccagaccctcagtctgacttgcactttctctgggttttcactgagcacttatagtatgggtgtgggctggattcgtcagccttcagggaagggtctggagtggctggcaaacatttggtgggatgatgataagttctcccatccatctctgaaaaaccggctcacaatctccaaggacacctccaacaaccaagcattcctcaagatcaccaatgtggacactgcagatactgccacatactactgtactcggatcagaggtaacaactacgcgggggactactttgattactggggccaaggagtcatggtcacagtctcgagtg
	Light	gacatccagatgacacagtctccttcactcctgtctgcatctgtgggagacagagtcactctcagctgcaaaggaagtcagaatattcacaattatttagcctggtaccaacaaaagcttggagaagctcccaaactcctgatacataaaacaaacagtttgcaaacgggcatcccatcaaggttcagtggcagtggatctaatacagattacacactcaccatcagcagcctgcactctgaagatcttgccacatattactgctatcagtattacaacgggctcacgttcggttctgggaccaagctggaaataaaac
#7	Heavy	gaggtgcacctggtggagtcaggacctggtctggtgcagccctcagagaccctgtccctcacctgcactgtctctgggttctcactaaccagctatagtgtaagttgggttcgccagccttcaggaaaaggtcctgagtggatgggaagaatgtggtatgatggagacacagcatataattcagctctcaaatcccgactgagcatcagcagggacacctccaagaaccaagttttcttaaaaatgaacagtctgcaaactgatgacacaggcacttactactgtaccagaga
	Light	gacatccagttgacccagtctccagcttccctgtctgcatctctgggagaaactgtcaccatcgaatgtcgagcaagtgaggacatttacagtaatttagcgtggtatcagcagaaaccagggaactctcctcagctcctgatctatgatgcaaatagcttggcagatggggtcccatcacggttcagtggcagtggatctggcacacagtattctctaaagataaacagcctgcaatctgaagatgtcgcaagttatttctgtcaacagtataacaattatcctcccacgtttggagctgggaccaagctggaattgaaac
#8	Heavy	gaggtgcagctgcaggagtctggacctggcctggtgcagccctcacagaccctgtctctcacctgcactgtctctgggttctcattaaccagctatcatgtgcactgggttcgacagcctccaggnaaaggtctggagtggatgggagtaatgtggagtgatggagacacatcatataattcagctctcaaatcccgactgagcatcagcagggacacctccaagagccaagttttcttaaaaatgagcagtctgcaaactgaagacacagccacttactactgtgccagagatccctttataacaactacggactttgattactggggccaaggagtcacggtcacagtctcgagtg
	Light	aacactgtgatgactcagtctccatcttatcttgctgcgtctcctggagaaagtgtttccatcaattgcaaggcaagtaaaagcattaacacatacttagcctggtatcaggagaaacctgggaaaacgaataagcttcttatctactctgggtcaactttgcaatctggaactccatcgagattcagtggcagtggatctggtacagatttcacgctcaccatcagaagcctggagcctgaagattttgcagtctactactgtcaacagcataatgaatacccgctcacgttcggttctgggaccaagctggaaataaaac
#9	Heavy	gaggtgcagctgcaggagtcaggacctggcctggtgcaaccaacacagaccctgtccatcacatgtactgtttctgggttctcattaaccagctattatatgcagtgggttcgccagactccaggaaagggactagaatggatgggatttatacggagtggtggaagcacagagtataattcagagttcaaatcccgacttagcatcagcagggacacctccaagaaccaagttttcttaaaaatgaacagtctgaaaacagaggacacaggcgtgtactactgtgccagagcggctatagcagctatatcccttatggatgcctggggtcaaggagcttcagtcactgtctcgagtg
	Light	gacattgtgctgacccagtctccaacaaccatggctgcatctccgggggagaaggtcaccatcacctgccgtgccagctccagtgtaagttacatgcactggtaccagcagaagccaggcgcctcccctaaaccctggatttatgacacatccaaactggcttctggagtcccaaatcgcttcagtggcagtgggtctgggacctcttattctctcacaatcagctccatggagactgaagacactgccacttattactgtcagcagtggagtagtaactcgtacacgtttggagctgggaccaagctggaaataaaac
	Light	gatgttgagctgacccagactccatcttatcttgctgcgtctcctggagaaagtgtttccatcaattgcaaggcaagtaaaagcattaacacatacttagcctggtatcaggagaaacctgggaaaacgaataagcttcttatctactctgggtcaactttgcaatctggaactccatcgagattcagtggcagtggatctggtacagatttcacgctcaccatcagaagcctggagcctgaagattttgcagtctactactgtcaacagcataatgaatacccgctcacgttcggttctgggaccaagctggaaataaaac
#10	Heavy	gaaatgcagctggtggagtctgggggaggcctagtgcagcctggaaggtccctgaaactctcctgtgcagcctcaggattcactttcagtaactattacatggcctgggtccgccaggctccaaagaagggtctggagtgggtcgcaaccattagtaccagtggtagcagaacttactatccagactccgtgaaaggccgattcactatctccagagataatgcaaaaagcagcctatacctgcaaatgaacagtctgaagtctgaggacacggccacttattactgtgcaagaggatcaactacgaattggtttgcttactggggccaaggcactctggtcactgtctcgagtg
	Light	gatgttgtgctgacccagactcctgttttggctgtgtctctagggcagagggccaccatctcttgcaagaccaaccagaatgtcgattattatggcaatagttatatgcactggtaccaacagaaaccaggacaacaacccaaactcctcatctatttagcatccaacttagcatctgggatccctgccaggttcagtggtagagggtctgggacagacttcaccctcaccattgatcctgtggaggctgatgatactgcaacctattactgtcagcagagtaggaatcttcctccgacgttcggtggaggcaccaagctggaaataaaac
	Light	gacatccagatgacccagtatccttcactcctgtctgcatctgtgggagacagagtcactcttagctgcaaaggaagtcagaatattaacaattacttagcctggtaccaacaaaagcttggagaagctcccaaactcctgatatataatacaaacagtttgcaaacgggcatcccatcaaggttcagtggcagtggatctggtacagattacacactcaccatcagcagcctgcagcctgaagatgttgccacatatttctgctatcagtataacaacgggtacacgtttggagctgggaccaagctggaactgaaac
#11	Heavy	gaggtgaagctggaggagtctgggggaggcttagtgcagcctggaaggtccctgaaactctcctgtgcagcctcaggattcactttcagtaactatgacatggcctgggtccgccaggctccaacgaagggtctggagtgggtcgcatccattagtcctagtggtggtagcacttactatcgagactccgtaaagggccgattcactgtctccagagataatgcaaaaagcagcctatacctgcaaatggacagtctgaggtctgaggacacggccacttattactgtgcaagacataagaatcccgggtataaccaggattactggggccaaggagtcacggtcacagtctcgagtg
	Light	gacgttgtgatgacccagactccatcctcccaggctgtgtcagcaggggagaaggtcactatgagctgcaagtccagtcagagtcttttatacaatgaaaacaaaaagaactacttggcctggtaccagcagaaaccagggcagtctcctaaactgctgatctactgggcatccactagggaatctggggtccctgatcgcttcataggcagtggatctgggacagatttcactctgaccatcagcagtgtgcaggcagaagacctggctgtttattactgccagcagtactataactttcctcggacgttcggtggaggcaccaagctggaaataaaac
	Light	attgtggcttcacccagntctccatcctcccaggctgtgtcagcaggggagaaggtcactatgagctgcaagtccagtcagagtcttttatacaatgaaaacaaaaagaactacttggcctggtaccagcagaaaccagggcagtctcctaaactgctgatctactgggcatctactaggcaatctggtgtccctgatcgcttcataggcagtggatctgggacagacttcactctgaccatcagcagtgtgcaggcagaagatctggctgtttattactgccagcagtactataactttcctcggacgttcggtggaggcaccaagctggaaataaaac
#12	Heavy	gaggtgcagttggtggantctgatggaggcttagtgcagcctggaaggtccctaaaactctcctgtgcagcctcaggattcactttcagtgactattacatggcctgggtccgccaggctccaacgaaggggctggagtgggtcgcaaccattagttatgatggtagtagcacttactatcgagactccgtgaagggccgattcactatctccagagataatgcaaaaagcaccctatacctgcaaatggacagtctgaggtctgaggacacggccacttattactgtgcaagaacggatagcagctatatctttgattactggggccaaggagtcacggtcacagtctcgagtg
	Light	aacatccagatgacccagtctccatcctctctggctgtgtcagcaggagagacggtcactataaactgcaagtccagtcagagtcttttatacagtggaaaccaaaagaactacttggcctggtaccagcagaaaccagggcagtctcctaaactgctgatctactgggcatctactaggcaatctggtgtccctgatcgcttcataggcagtggatctgggacagacttcactctgaccatcagcagtgtgcaggcagaagatctggcaatttattactgtcagcagtattatgatactccattcacgttcggctcagggacgaagttggaaataaaac
#13	Light	gatgttgtgctgacccagactccacccactttgtcggctaccattggacaatcagtctccatctcttgcaggtcaagtcagagtctcttacatagtaatggaaacacctattttcattggttactacagaggccaggccaatctccacagcttctaattcacttggtatccagactggaatctggggtccccaacaggttcagtggcagtgggtcaggaactgatttcacactcaaaatcagtggagtagaggctgaggatttgggagttttttattgtatacaaggtacccatgctccgtggacgttcggtggaggcaccaggctggaattgaaac
	Heavy	gaggtgcagctggtggagtctgggggaggcttagtgcagcctggaaggtccatgaaactctcctgtgcagcctcaggattcactttcagcaactatgacatggcctgggtccgccaggctccaaagaagggtctggagtgggtcgcaaccattagttatgatggtagtagcacttactttcgagactccgtgaagggccgattcactatctccagagataatgaaaaaagcaccctatacctgcaaatggacggtctgaggtctgaggacacggccacttattactgtacaacacgggggattaccttcccgcactactttgattactggggccaaggagtcatggtcacagtctcctcag
#14	Light	gacattcagatgacccagtctccatcctccatgtctgtgtctctgggagacacagtcactattacttgccgggcaagtcaggacgttgggatttatgtaaactggttccagcagaaaccagggaaatctcctaggcgtatgatttatcgtgcaacgaacttggcagatggggtcccatcaaggttcagcggcagtaggtctggatcagattattctctcaccatcagcagcctggagtctgaagatgtggcagactatcactgtctacagtatgatgagtatccgtacacgtttggagctgggaccaagctggaactgaaac
	Heavy	gaggtgcagctggtggagtctggaggaggcttagtgcagcctggaaggtccctgaaactctcctgcttagcctctggattcactttcagtaactatggaatgaactggattcgccaggctccagggaaggggctggagtgggttgcatctattagtagtagtagcagttacatctactatgcagacacagtgaagggccgattcaccatctccagagaaaatgccaagaacaccctgtacctgcaaatgaccagtctgaggtctgaagacactgccttgtattactgtgcaagagagggccggggggctatggatgcctggggtcaaggaacttcagtcactgtctcctcag
#15	Light	gatgttgtgatgacccagacaccaccatctttgtcggttgccattggacagtcagtctccatctcttgcaagtcaagtcaaagcctcgtagctagtgataaaaatacatatttgaattggtttttacagagtcctggccggtctccgaggcgcctaatctctcaggtgtctaagctggactctggagtccctgacaggttcagtggcagtgggtcagagaaagatttcacacttaaaatcagcagagtggagactgaagatctgggagtttattactgcctgcaagctacacatcttccattcacgttcggctcagggacgaagttggacatgaaac
	Heavy	gaggtgcagctggtggagtctgggggaggcttagtgcagcctggaaggtccatgaaactctcctgtgcagcctcaggattcactttcagtaactattacatggcctgggtccgccaggctccaacgaagggtctggagtgggtcgcatccattagtactggtggtggtaacacttactatcgagactccgtgaagggccgattcactatctccagagataatgcaaaaagcaccctatacctgcaaatggacagtctgaggtctgaggaaacggccacttattactgtgcaagacataggtatactacggattattactacggctggtactttgacttctggggcccaggaaccatggtcaccgtgtcctcag
# 16	Heavy	caggtgcagctgatggagtctggaggaagcttgattcaacctgggggttctctgaaactctcttgtgtagcctcagggtacactttcggtaactactggatggactgggttcggcagactcctggaaagtccctggagtggattggagagattaacacggatggcagtacgatcaactatgcaccatccataaaggatcgattcacaatctccagagacaatgccaagagcaccctgtatctgcagatgagcaatgtgaaatcagatgacacagccaattattactgtactagaagggactatggaagcctctatattacggatgcctggggtcaaggagcttcagtcactgtctcgagtg
	Heavy	gaggtgcagctagtggagnctggaggaagcttgattcaacctgggggttctctgaaactctcttgtgtagcctcagggtacactttcggtaactactggatggactgggttcggcagactcctggaaagtccctggagtggattggagagattaacacggatggcagtacgatcaactatgcaccatccataaaggatcgattcacaatctccagagacaatgccaagagcaccctgtatctgcagatgagcaatgtgaaatcagatgacacagccaattattactgtactagaagggactatggaagcctctatattacggatgcctggggtcaaggagcttcagtcactgtctcgagtg
	Light	gatgttgtgctgacccagactcctgttttggctgtgtctctagggcagagggccaccatctcctgtagggccagccagagtgtcagtatatctagcattaatttgatgcactggtaccaacagaaaccaggacagcaacccaaactcctcatctatcgtgcatccaacctagcatctgggatccctgccaggttcagtggcagtgggtctgggacagacttcaccctcaccatcgatcctgtgcaggctgatgatattgcagcctattactgtcagcagagtagggagtctccgtggacgttcggtggaggcaccaagctggaaataaaac
	Light	gatgttgtgatgacacagactccttcattcctgtctgcatctgtgggagacagagtcactatcaactgcaaagcaagtcagaatgttaacaaatacttaaactggtatcagcaaaagcttggagagactcccaaacgcctgatttataatacaaacagtttgcaaaccggcatcccatcaaggttcagtggcagtggatctggtacagattacacactcaccatcagcagcctgcagcctgaagatgttgccacatatttctgccagcagtttagcagctggccggacacgtttggacctgggaccaagctggaattgaaac
# 17	Heavy	agggtgaagctggtggagtctgggggaggcttagtgcagcctggaaggtccatgaaactctcctgtgcagcctcaggattcactttcagtgactatggcatggcctgggtcctccaggctccaacgaagggtctggagtgggttgcatccattagttatgatggtggtagcacttactatcgagactccgtgaagggccgatttactatctccagagataatgcaaaaagcaccctatacctgcaaatggaaagtctgaggtctgaggacacggccacttattactgtgcaaaagaacttgattactggggccaaggagtcacggtcacagtcctcgagt
	Heavy	gagatacaactggtggagtctgggggaggcttagtgcagcctggaaggtccatgaaactctcctgtgcagcctcaggattcactttcagtaactattacatggcctgggtccgccaggctccaacgaagggtctggagtgggtcgcatccattagtactggtggtggtaacacttactatcgagactccgtgaagggccgatttactatctccagagataatgcaaaaagcaccctatacctgcaaatggaaagtctgaggtctgaggacacggccacttattactgtgcaagagggaggaccgttgattactggggccaaggagtcacggtcacagtctcgagtg
	Light	gacatccagatgacccagtctccacccactttatcggctaccattggacaatcggtctccatctcttgcaggtcaagtcagagtctcttagatagtgatggagatacctatttaaattggttgctacagaggccaggccaatctccacagcttctaatttattcggtatccaacctggaatctggggtccccaacaggttcagtggcagtgggtcagaaacagatttcacactcaaaatcagtggagtggaggctgaagatttgggagtttattactgcatgcaagctacccatgctccattcacgttcggctcagggancgaagttggaaataaaa
	Light	ttgntgatgactcagntctccatcctcccaggctgntgntcagcaggggagaaggtcactatgagctgcaagtccagtcagagtcttttatacaatgaaaacaaaaagaactacttggcctggtaccagcagaaaccagggcagtctcctaaactgctgatctactgggcatccactagggaatctggggtccctgatcgcttcataggcagtggatctgggacagatttcactctgaccatcagcagtgtgcaggcagaagacctggctgtttattactgccagcagtactataacttgtacacgtttggagctgggaccaagctggaactgaaac
# 18	Heavy	gaggtgcacctggtggagtctggtggaggcttggtgcagccctcacagactttgtctctcacctgcactgtctctgggttctcactaaccagctatcatgtaagctgggttcgccagcctccaggaaaaggtctggagtggatgggagtaatatggactggtggaagcacagcatataattcacttctcaaatcccgactgagcatcagcagggacacctccaagagccaagttttcttaaaaatgaacagtctgcaaactgaagacacagccacttactactgtgccagagcccagggggtaacctggtactttgacttctggggcccaggaaccacggtcacagtctcgagtg
	Light	ctgntgcctgacccagntctccattctccctggctgtgntcagaaggagagatggtcactataaactgcaagtccagtcagagtcttttatccagtggaaaccaaaagaactacttggcctggtaccagcagaaaccagggcagtctcctaaactactgatctactatgcatccactaggcaatcaggggtccctgatcgcttcataggcagtggatctgggacagacttcactctgaccatcagcgatgtgcaggctgaagacctggcagattattactgcctgcagcattacagctcttacacgtttggagctgggaccaagctggaattgaaac
	Light	gatgttgtgatgacacaaactccattctccctggctgtgtcagaaggagagatggtcactataaactgcaagtccagtcagagtcttttatccagtggaaaccaaaagaactacttggcctggtaccagcagaaaccagggcagtctcctaaactactgatctactatgcatccactaggcaatcaggggtccctgatcgcttcataggcagtggatctgggacagacttcactctgaccatcagcgatgtgcaggctgaagacctggcagattattactgcctgcagcattacagctcttacacgtttggagctgggaccaagctggaactgaaac
# 19	Heavy	caggtgcagctgatggagtctggaggaggcttagtgcagcctggaaggtccctgaaactctcctgtgtagcctctggattcactttcagtgactatggaatgaattggattcgccaggctccagggaaggggctggagtgggttgcatatattagtagtagcaggggtacaatctactatgcggacactgtgaagggtcgattcaccatttccagagataatgccaagaacaccctttatctccaactgagcagtctgaggtctgaggacaccgccttgtattactgtgcaagacacaacgctccggacttctggggcccaggaaccatggtcaccgtctcgagtg
	Heavy	gaggtgaagctggtggagtctggaggaggcttagtgcagcctggaaggtccctgaaactctcctgtgtagcctctggattcactttcagtgactatggaatgaattggattcgccaggctccagggaaggggctggagtgggttgcatatattagtagtagcagtggtacaatctactatgcggacactgtgaagggtcgattcaccatttccagagataatgccaagaacaccctttatctccaactgagcagtctgaggtctgaggacaccgccttgtattactgtgcaagacacaacgctccggacttctggggcccaggagtcacggtcacagtctcgagtg
	Light	aggtgtgatatccggatgacacagntctccctgcttatcagccttggaggtcaagcctctatctcttgccggtctagtcagagcctggtacacagtaatggaaacacctacttgcattggtacctgcagaagccaggccagtctccacagctcctcatctatcaggtttccaacagattttctgggatctcagacaggttcagcggtagtgggtcagggacggatttcaccctcaagatcagcagaatagagcctgaggacttgggagttttttactgcttacaacgttcacattatccgtggacgttcggtggaggcaccaagctggaaataaaac
# 20	Heavy	gaggtgaagctggtggagtctggaggaggtttggtacagccggggggttctctgagactctcctgtgcagcttctggattcaccttcactgatttctacatgagctggatccgccagcctccagggaaggcacctgagtggttgggtgttattagaaacaaagctaatggttacacaacagagtacaatccatctgtgaaggggcggttcaccatctccagagataatacccaaaacatcctctatcttcaaatgaacaccctgagagctgaggacactgccatttactanctgtgcaagaggaanccccgtttgtttanctggggccaaggcactctagtcactgtctgcgagt
	Heavy	gaggtgcagttggtggagtctggtggaggcttggtgcagccggggggttctctgagactctcctgtgcagcttctggattcaccttcactgatttctacatgagctggatccgccagcctccagggaaggcacctgagtggttgggtgttattagaaacaaagctaatggttacacaacagagtacaatccatctgtgaaggggcggttcaccatctccagagataatacccaaaacatcctctatcttcaaatgaacaccctgagagctgaggacactgccatttactactgtgcaagaggaaccccgtttgtttactggggccaaggcactctagtcactgtctcgagtg
	Light	aacatccagatgacccagtctcctgcctccctgtctgcatctctggaagaaattgtcaccatcacatgccaggcaagccaggacattggtaattacttatcatggtatcagcagaaactggggaaatctcctcagctcctgatccatagtgcaaccagcttggcagatggggtcccatcaaggttcagcggcagtagatctggcacacagtattctcttaagatcaacagactacaggttgaagatactggaatctattactgtctacagcattatagtgctccattcacgttcggctcagggacgaagttggaaataaaac
# 21	Heavy	gaggtgcagttggtggagtctgggggaggcttagtgcagcctggaaggtccatgaaactctcctgtgcagcctcaggattcactttcagtaactattacatggcctgggtccgccaggctccaaagaagggtctggagtgggtcgcaaccattagttatgatggtagtagcacttactatcgagactccgtgaagggccgattcactatctccagagataatgcaaaaagcaccctatacctgcaaatggacagtctgaggtctgaggacacggccacttattactgtgcaagagatgttaattcggggtactggtactttgacttctggggcccaggaaccacggtcaccgtctcgagtg
	Light	aaattgtgntcacccagntctccagtctccctgcttatcagccttggaggtcaagcctctatctcttgccggtctagtcagagcctggtacacagtaatggaaacacctacttgcagtggttcctgcagaagccaggccagtctccacagctcctcatctatcaggtttccaacagattttctgggatcccagacaggttcagtggtagtgggtcagggacggatttcaccctcaagatcagcagagtagagcctgaggacttgggagttttattactgcttacaacgtacatataatccgtacacgtttggagctgggaccaagctggaattgaaac
	Light	caggtgtgatatccggatgacacagtctccctgcttatcagccttggaggtcaagcctctatctcttgccggtctagtcagagcctggtacacagtaatggaaacacctacttgcagtggttcctgcagaagccaggccagtctccacagctcctcatctatcaggtttccaacagattttctgggatcccagacaggttcagtggtagtgggtcagggacggatttcaccctcaagatcagcagagtagagcctgaggacttgggagttttattactgcttacaacgtacatataatccgtacacgtttggagctgggaccaagctggaattgaaac
# 22	Light	gacattgtgatgacccagtctccttcattcctgtctacatctgtgggagaaagagtcactctcagctgcaaagcaagtcagaatattaacaagtacttagactggtatcagcaaaagcttggagaagctcccaaactcctgatatataatacaaacaatttgcatacgggcatcccatcaaggttcagtggcagtggatctggtacagattacacactcaccatcagcagcctgcagcctgaagatgttgccacatatttctgcttgcagcgtaatagttggccggacacgtttggagctgggaccaagctggaattgaaac
	Light	gacatccagatggcccagactccttcattcctgtctgcatctgtgggagaaagagtcactctcagctgcaaagcaagtcagaatattaacaagtacttagactggtatcagcaaaagcttggagaagctcccaaactcctgatatataatacaaacaatttgcatacgggcatcccatcaaggttcagtggcagtggatctggtacagattacacactcaccatcagcagcctgcagcctgaagatgttgccacatatttctgcttgcagcgtaatagttggccggacacgtttggagctgggaccaagctggaaataaaac
	Heavy	gaggtgcagctggtggagtctgggggaggcttagtgcagcctggaaggtccctgaaactctcctgtgcagcctcaggattcactttcagtaactatgacatggcctgggtccgccaggctccaacgaagggtctggagtgggtcgcatccattagtcctagtggtggtagcacttactatcgagactccgtgaagggccgattcactgtctccagagataatgcaaaaagcaccctatacctgcaaatggacagtctgaggtctgaggacacggccacttattactgtgcaagaccatcttataacaactaccgcaaagggtttgcttactggggccaaggcactctggtcactgtctcttcag
# 23	Heavy	gaggtgaagctggtggagtctggacctggtctggtgcagccctcacagaccctgtctctcacctgcactgtctctggattctcattaaccagcaatggtgtaagctgggttcgccagcctccaggaaagggtctggagtggattgcagcaatatcaagtggtggaagcacatattataattcagctctcaaatcccgactgagcatcagcagggacacctccaagagccaagttttcttaaaaatgaacagtctgcaaactgaagacacagccatttacttctgtaccagagggtataactttgattactggggccaaggagtcacggtcacagtctcgagtg
	Light	gatgttgtgatgacacaaactccagtctccctgcctgtcagccttggaggtcaagtctctatctcttgccggtcaagtcagagccttgtacacagtgatggaaacacctacttgcattggtatctgcagaagtcaggccagtctccacagctcctcatctatcgggttgccaacagattttctggggtgccagacaggttcagtggcagtgggtcagggacagatttcaccctcgagatcagcagagtagagcctggggacttgggagtttattactgcttacaaagtacacatgttccgtacacgtttggagctgggaccaagctggaattgaaac
	Light	gatgttgtgatgacccagactccatcctccatgtctgcatctctgggagacagagtcactattacttgccaggcaagtcaggacattgggaataatttaatctggttccagcagaaaccagggaaatctcctaggcgtatgatttattatgcaaccaacttggcaaatggggtcccatcaaggttcagtggcagtaggtctgggtcagattattctctgaccattatcagcctggagtctgaagatatggcagactatcactgtctacagtataaacagtatccgtacacgtttggagctgggaccaagctggaactgaaac
# 24	Heavy	gaggtgcagctagtggagactgggggaggcctagtgcagcctggaaggtccctgaaactctcctgtgcagcctcaggattcactttcagtaactattacatggcctgggtccgccaggctccaaagaagggtctggagtgggtcgcaaccattagtaccagtggtagcagaacttactatccagactccgtgaaaggccgattcactatctccagagataatgcaaaaagcagcctatacctgcaaatgaacagtctgaagtctgaggacacggccacttattactgtgcaagacgagactacggagggtataggggttttgattactggggccaaggagtcatggtcacagtctcgagtg
	Light	gacatccagatgacacagtctccagcttccctgtctgcatctctgggagaaactatctccatcgaatgtctagcaagtgagggcatttccagttatttagcgtggtatcagcagaagccagggaaatctcctcagctcctgatctatggtgcaaatagcttgcaagctggggtcccatcacggttcagtggcagtggatctggcacacagtattctctcaagatcagcagcatgcaacctgaagatgaaggggattatttctgtcaacagagttacaagtttccgtggacgttcggtggagggcaccaagctggaactgaaac
# 25	Heavy	gagatacaactggtggagtctgggggcggcttagtgcagcctggaaggtccatgaaactctcctgtgcagcctcaggattcactttcagtaactatggcatggcctgggtccgccaggctccaaagaagggtctggagtgggtcgcatacattagttatgatggtggtagcacttactatcgagactccgtgaagggccgattcactatctccagagataatgcaaaaagcaccctatacctgcaaatggacagtctgaggtctgaggacacggccacttattactgtacaacagataattcggggtggtttgcttactggggccaaggcactctggtcactgtctcgagtg
	Heavy	gaggtgaagctgttggaatctgggggcggcttagtgcagcctggaaggtccatgaaactctcctgtgcagcctcaggattcactttcagtaactatggcatggcctgggtccgccaggctccaaagaagggtctggagtgggtcgcatacattagttatgatggtggtagcacttactatcgagactccgtgaagggccgattcactatctccagagataatgcaaaaagcaccctatacctgcaaatggacagtctgaggtctgaggacacggccacttattactgtacaacagataattcggggtggtttgcttactggggccaaggcactctagtcactgtctcgagtg
	Light	gacattgtcntgacccagtctccagtatccattactgcatctcaaggagagaaggtcaccatcacctgccgtgccagctcaagtataagttccaattacttgcactggtaccagcagaaggcaggatcctaccctaaactcttgatttatcggacatccatcctggcttctggattcccagacagcttcagtggcagtgggtctgatacctcttacactctgacaatcagctgcatgcaggatgaagttgctgcctcttactattgtcagcaggggagtagtagcccacccacgttcggttctgggaccaagctggaaataaaac
	Light	gacattgtgatgactcagtctccagtatccattactgcatctcaaggagagaaggtcaccatcacctgccgtgccagctcaagtataagttccaattacttgcactggtaccagcagaaggcaggatcctaccctaaactcttgatttatcggacatccatcctggcttctggattcccagacagcttcagtggcagtgggtctgatacctcttacactctgacaatcagctgcatgcaggatgaagttgctgcctcttactattgtcagcaggggagtagtagcccacccacgttcggttctgggaccaagctggaaataaaac
	Light	gacatccagatgacccagggtgcactccccaatcctgtcccttctggagagtcagtttcgatcacctgcaggtctagcaagagtctgctatacagcaatggcaagacatacttgaattggtatctacagaggccaggacagtctcctcagctcctgatctattggatgtctacccgtgcatcaggagtctcagacaggttcagtggcagtgggtctgggacagatttcacactgaagatcagtggcgtggaggctgacgatgtgggtgtatattactgtcagcaaggtctagactttccattcacgttcggctcagggacgaagttggaaataaaac
# 26	Heavy	gtaactaccggtgtccattctcaggtcaagctgctgcagtctggaaggtccctgaaactctcctgtgcagcctcaggattcactttcagtgactatggcatggcctgggtcctccaggctccaacgaagggtctggagtgggtcgcatccattagtactagtggtggtagcacttattatcgagactccgtgaagggccgattcactgtctccagagataatgcaaaaagcaccctatacctgcaaatggacagtctgaggtctgaggacacggccacttattactgtgcaagacgatacggagggtttgattactggggccaaggagtcacggtcacagtctcgagtg
	Heavy	gaaatgcagctggtggagtctgggggaggcttagtgcagcctggaaggtccatgaaactctcctgtgcagcctcaggattcactttcagtaactatgacatggcctgggtccgccaggctccaacgaagggtctggagtgggtcgcatccattagtactagtggtggtagcacttattatcgagactccgtgaagggccgattcactgtctccagagataatgcaaaaagcaccctatacctgcaaatggacagtctgaggtctgaggacacggccacttattactgtgcaagacgatacggagggtttgattactggggccaaggagtcacggtcacagtctcgagtg
	Light	gacgtccagatgacccagcctccattctccctggctgtgtcagaaggagagatggtcactataaactgcaagtccagtcagagtcttttatccagtggaaaccaaaagaactacttggcctggtaccagcagaaaccagggcagtctcctaaactactgatctactatgcatccactaggcaatcaggggtccctgatcgcttcataggcagtggatctgggacagacttcactctgaccatcagcgatgtgcaggctgaagacctggcagattattactgcctgcagcattacagctcgtacacgtttggagctgggaccaagctggaaataaaac
# 27	Heavy	gaggtgaagctggaggagtctggacctggcctggtgcagccctcacagaccctgtctctcacctgcactgtctctgggttctcattaaccagctatcatgtgcactgggttcgacagcctccaggaaaaggtctggagtggatgggagtaatgtggagtgatggagacacatcatataattcagctctcaaatcccgactgagcatcagcagggacacctccaagagccaagttttcttaaaaatgagcagtctgcaaactgaagacacagccacttactactgtgccagagggatgtatactgattactggggccaaggagtcacggtcacagtctcgagtg
	Heavy	gagatacaactggtggagacaggacctggcctggtgcagccctcacagaccctgtctctcacctgcactgtctctgggttctcattaaccagctatcatgtgcactgggttcgacagcctccaggaaaaggtctggagtggatgggagtaatgtggagtgatggagacacatcatataattcagctctcaaatcccgactgagcatcagcagggacacctccaagagccaagttttcttaaaaatgagcagtctgcaaactgaagacacagccacttactactgtgccagagggatgtatactgattactggggccaaggagtcatggtcacagtctcgagtg
	Light	gatgttgtgttgacccagactccaacaaccatggctgcatctccaggagagaaggtcaccatcacctgccgtgccagctcaagtgtaagctacatgcactggttccagcagaagtcaggcacctcccccaaaccctggatttatgacacatccaagctggcttctggagtcccagatcgcttcagtggcagtgggtctgggacctcttattctctcacaatcagctccatggaggctgaagatgctgctacttattactgtctgcagaggagtagttacccacggacgttcggtggaggcaccaagctggaaataaaac
	Light	gatgtccagatgacccagactccatctcatcttgctgcctctcctggagaaagtgtttccatcaattgcaaggcaagtaagaccattagcaagtatttagcctggtatcaacagaaacctgggaaagcaaataagcttcttatctactctgggtcaactttgcaatctggaactccatcgaggttcagtggcagtggatctggtacagatttcactctcaccatcagaaacctggagcctgaagattttggactctattactgtcaacagcataatgaatacccaccgacgttcggtggaggcaccaagctggaattgaaac
# 28	Light	gacattgtgatgacccagactccctcctccctggctgtgtcagcaggagacaaggtcactatgagctgcaagtccagtcagagtcttttttccagtgaataccaagggaactacttgtcctggttccagcagaaaccagggcagtctcctaaactgctgatctactgggcatctactaggcaatctggtgtccctgatcgcttcataggcagtggatctgggacagacttcactctgaccatcagcagtgtgcaggcagaagatctggcaatttattactgtcagcagtattatgatactctcatgtacacgtttggagctgggaccaagctggaaataaaac
	Light	gatgtccagatgacccagcctccttcactcctgtctgcatctgtgggagacagagtcactctcagctgcaaaggaagtcagaatattaacaattacttagcctggtaccaacaaaagcttggagaagctcccaaactcctgatatataaaacaaacagtttgcaaacgggcatcccatcaaggttcagtggcagtggatctggtacagattacacactcaccatcagcagcctgcactctgaagatcttgccacatattactgctatcagtataacaacgggtggacgttcggtggaggcaccaagctggaattgaaac
	Light	gatgttgtgatgacccagacaccttcactcctgtctgcatctgtgggagacagagtcactctcagctgcaaaggaagtcagaatattaacaattacttagcctggtaccaacaaaagcttggagaagctcccaaactcctgatatataaaacaaacagtttgcaaacgggcatcccatcaaggttcagtggcagtggatctggtacagattacacactcaccatcagcagcctgcactctgaagatcttgccacatattactgctatcagtataacaacgggtggacgttcggtggaggcaccaagctggaactgaaac
	Heavy	gaggtgaagctagtggagtctggacctggccttgtgaaaccttcacagtcactctccctcacctgttctgtcactggttacaccattaccagtggttatgattggagctggatccggaagttcccaggaaataaaatggagtggatgggatacataagctacagtggtagcactaactacaacccatcgctcaaaagtcgaatctccattacaagagacacatccaagaatcagttcttcctgcagttgaactctgtaactactgaggatacagccacatattactgtacaagctggataaccccctggggccaaggcactctagtcactgtctcgagtg
	Heavy	gaggtgaagctgttggaatctggacctggccttgtgaaaccttcacagtcactctccctcacctgttctgtcactggttacaccattaccagtggttatgattggagctggatccggaagttcccaggaaataaaatggagtggatgggatacataagctacagtggtagcactaactacaacccatcgctcaaaagtcgaatctccattacaagagacacatccaagaatcagttcttcctgcagttgaactctgtaactactgaggatacagccacatattactgtacaagctggataaccccctggggccaaggcactctggtcactgtctcgagtg
# 29	Heavy	gaggtgcagttggtggagtctggacctggtctggtgcagccctcacagaccctgtccctcacctgcactgtctctggattctcattaaccagctatcatgtaagctgggttcgccagcctccaggaaagggtctggagtggattgcagcaatatcaagtggtggaagcacatattataattcagctctcaaatcccgactgagcatcagcagggacacctccaagagccaagtttttttaaaaatgaacagtctgcaaactgaagacacagccatttacttctgtaccggtgggggattatcggattactggggccaaggagtcacggtcacagtctcgagtg
	Light	aacactgtgatgactcagtctccttcactcctgtcagcatctgtgggagacagagtcactctcagctgcaaagcaagtcagaatatttacaagtacttaaactggtatcagcaaaagcttggagaagctcccaaactcctgatatattatacaaacagtttgcaaacgggcatcccatcaaggttcagtggcagtggatctggtacagatttcacacttaccatcagcagcctgcagcctgaagatgttgccacatattactgctatcagtataacagtgggaacacgtttggagctgggaccaagctggaaataaaac
# 30	Heavy	caagttaagctgcagcaatcaggacctggccttgtgaaaccttcacagtcactctccctcacctgttctgtcactggttacaccattaccagtggttatgattggagctggatccggaagttcccaggaaataaaatggagtggatgggatacataagctacagtggtagcactaactacaacccatcgctcaaaagtcgaatctccattaccagagacacatccaagaatcagttcttcctgcagttgaactctgtaactactgaggatacagccacatattactgtgcaagacttatgtatactacggattattactactggtactttgacttctggggcccaggaaccatggtcaccgtctcgagtg
	Light	gacantnnnntgacccagtctcccacatccatgtccatatcagtaggagacagggtcaccatgaactgcaaggccagtcaaaatgtgggttctaatgtagactggtaccaacagaaaacagggcagtctcctaaactgcttatctacaaagcatccaaccggtacacgggagtccctgatcgcttcacaggcagtggatctggaacagatttcactttcaccatcagcaacatgcaggctgaagacctggctgtttattactgtatgcagtctaactcctatccgtggacgttcggtggaggcaccaagctggaattgaaac
