# Supplementary material for: Rapid isolation of antigen-specific B-cells using droplet microfluidics
Source: RSC Adv. 2020 Jul 20;10(45):27006–13. doi: 10.1039/d0ra04328a (PMC9055518; doi:10.1039/d0ra04328a)
Supplement: RA-010-D0RA04328A-s003 [file RA-010-D0RA04328A-s003.xlsx]

## Sheet: Sheet1
Heavy Chain								Light Chain
scFv number	Binding signal in TNF-α ELISA	V-GENE	J-GENE	CDR1-IMGT	CDR2-IMGT	CDR3-IMGT with 3aa FR sequence on each side in italics	CDR3-IMGT	V-GENE	J-GENE	CDR1-IMGT	CDR2-IMGT	CDR3-IMGT with 3aa FR sequence on each side in italics	CDR3-IMGT
1	+	IGHV5	IGHJ2	GFTFSNFG	ISTSGGNT	YYCTTLDITVVAYFDY	TTLDITVVAYFDY	IGKV3	IGKJ2	QNVDYYGNSY	LVS	YYCQQSRNLPYTFGA	QQSRNLPYT
2	+	IGHV5	IGHJ4	GFTFSDYY	ISYEGSST	YYCARHLAYTTDSPLMDAWGQ	ARHLAYTTDSPLMDA	IGKV22	IGKJ2	QNIYKN	NAN	YFCQQYYSGYTFGA	QQYYSGYT
3	+	IGHV5	IGHJ2	GFTFTNYY	ISTGGDVT	YYCARRRYGTSDYFDYWGQ	ARRRYGTSDYFDY	IGKV12	IGKJ1	QDIDDY	DAT	YYCLQSHSIPWTFGG	LQSHSIPWT
4	+	IGHV5	IGHJ2	GFTFSNYY	ISTGGGNT	YYCAGGDPGITPDYWGQ	AGGDPGITPDY	IGKV4	IGKJ2	SSVSY	DTS	YYCLQRSSYPYTFGA	LQRSSYPYT
5	+	IGHV1	IGHJ3	GYTFTDYY	INPNSGYT	YYCTREGSDYSGPFAYWGQ	TREGSDYSGPFAY	IGKV6	IGKJ5	QNVGIN	WAS	YYCLQHNSYPLTFGS	LQHNSYPLT
6	+	IGHV8	IGHJ2	GFSLSTYSMG	IWWDDDK	YYCTRIRGNNYAGDYFDYWGQ	TRIRGNNYAGDYFDY	IGKV15	IGKJ5	QNIHNY	KTN	YYCYQYYNGLTFGS	YQYYNGLT
7	NB	IGHV2		GFSLTSYS	MWYDGDT	YYCTR*	TR	IGKV12	IGKJ2	EDIYSN	DAN	YFCQQYNNYPPTFGA	QQYNNYPPT
8	+/-	IGHV2	IGHJ2	GFSLTSYH	MWSDGDT	YYCARDPFITTTDFDYWGQ	ARDPFITTTDFDY	IGKV16	IGKJ5	KSINTY	SGS	YYCQQHNEYPLTFGS	QQHNEYPLT
9	+	IGHV5	IGHJ4	GFSLTSYY	IRSGGST	YYCARAAIAAISLMDAWGQ	ARAAIAAISLMDA	IGKV16	IGKJ5	KSINTY	SGS	YYCQQHNEYPLTFGS	QQHNEYPLT
10	+/-	IGHV5	IGHJ3	GFTFSNYY	ISTSGSRT	YYCARGSTTNWFAYWGQ	ARGSTTNWFAY	IGKV22	IGKJ2	QNINNY	NTN	YFCYQYNNGYTFGA	YQYNNGYT
11	+	IGHV5	IGHJ2	GFTFSNYD	ISPSGGST	YYCARHKNPGYNQDYWGQ	ARHKNPGYNQDY	IGKV8	IGKJ1	QSLLYNENKKNY	WAS	YYCQQYYNFPRTFGG	QQYYNFPRT
12	++	IGHV5	IGHJ2	GFTFSDYY	ISYDGSST	YYCARTDSSYIFDYWGQ	ARTDSSYIFDY	IGKV8	IGKJ4	QSLLYSGNQKNY	WAS	YYCQQYYDTPFTFGS	QQYYDTPFT
13	+	IGHV5	IGHJ2	GFTFSNYD	ISYDGSST	YYCTTRGITFPHYFDYWGQ	TTRGITFPHYFDY	IGKV22	IGKJ1	QSLLHSNGNTY	LVS	FYCIQGTHAPWTFGG	IQGTHAPWT
14	+	IGHV5	IGHJ4	GFTFSNYG	ISSSSSYI	YYCAREGRGAMDAWGQ	AREGRGAMDA	IGKV14	IGKJ2	QDVGIY	RAT	YHCLQYDEYPYTFGA	LQYDEYPYT
15	++	IGHV5	IGHJ1	GFTFSNYY	ISTGGGNT	YYCARHRYTTDYYYGWYFDFWGP	ARHRYTTDYYYGWYFDF	IGKV1	IGKJ4	QSLVASDKNTY	QVS	YYCLQATHLPFTFGS	LQATHLPFT
	Key:
	+/-	ELISA signal is ~130-175% of that obtained with myc-tagged negative control scFv.
	+	ELISA signal is ~175-300% of that obtained with myc-tagged negative control scFv.
	++	ELISA signal is more than 300% of that obtained with myc-tagged negative control scFv.
	NB	No binding in ELISA.
	*	Germline was not rearranged.
